# Supplementary material for: Inhibition of transcription by dactinomycin reveals a new characteristic of immunogenic cell stress
Source: PubMed Central journal article supplement (PMC7207166; doi:10.15252/emmm.201911622), 2020-04-23
Supplement: EMMM-12-e11622-s001.pdf [file EMMM-12-e11622-s001.pdf]

## Appendix

# Inhibition of transcription by dactinomycin reveals a new characteristic of immunogenic cell stress

Juliette Humeau, Allan Sauvat, Giulia Cerrato, Wei Xie, Friedemann Loos Francesca Iannantuoni, Lucillia Bezu, Sarah Lévesque, Juliette Paillet, Jonathan Pol, Marion Leduc, Laurence Zitvogel, Hugues de Thé, Oliver Kepp, Guido Kroemer

### Table of content

- Appendix Fig S1 IC<sub>60</sub> of predicted ICD inducers.
- Appendix Fig S2 Validation of the eIF2 $\alpha$  kinases knock out.
- Appendix Fig S3 Gating strategy for quantification of phagocytosis.
- Appendix Fig S4 Gating strategy for quantification of MHCII<sup>+</sup> and CD86<sup>+</sup> cells among CD11c<sup>+</sup> cells.
- Appendix Fig S5 Transcription and translation inhibitors are predicted as ICD inducers.
- Appendix Fig S6 Sequence for the eIF2 $\alpha$  knock-in mutation.
- Appendix Table S1 Transcription and translation inhibition data for the custom anti-cancer library.
- Appendix Table S2 Transcription inhibition for the positive and negative hits selected with the artificial intelligence module.
- Appendix Table S3 ICD scores of specific categories of agents.
- Appendix Table S4 DNA sequences for U2OS eIF2 $\alpha$ S51A and eIF2AK<sup>-/-</sup> generation.
- Appendix Table S5 Statistical tests and p-values.

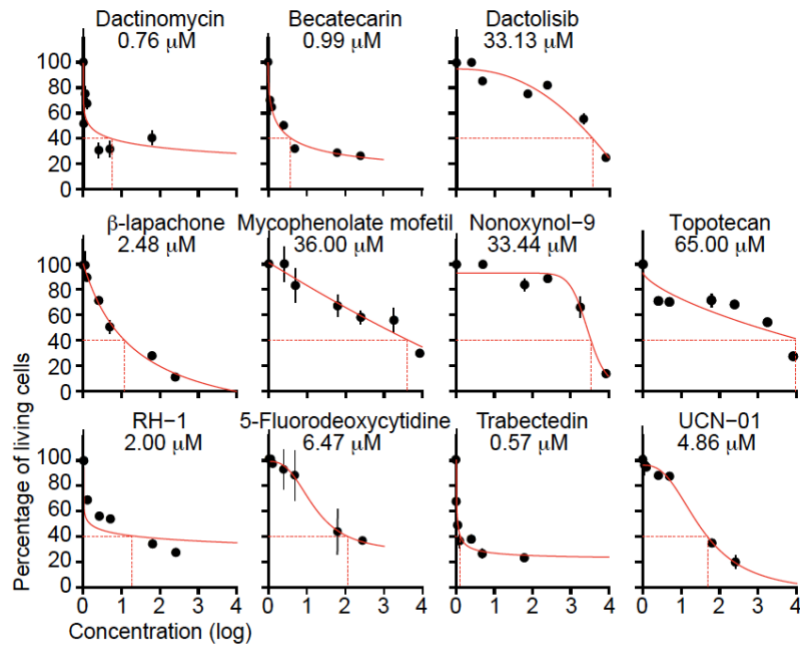

**Appendix Figure S1**

**Appendix Figure S1. IC<sub>60</sub> of predicted ICD inducers.**

To determine the IC<sub>60</sub> (concentration of the agent that reduces viability to 40 %), we treated human osteosarcoma U2OS wild-type cells for 24 h with a range of concentrations from 0.01 to 5 μM for dactinomycin and trabectedin; from 0.05 to 10 μM for becatecarin, RH-1, β-lapachone and 5-fluorodeoxycytidine; from 0.5 to 50 μM for dactolisib, UCN-01, topotecan and mycophenolate mofetil and from 1 to 100 μM for nonoxynol-9. Then cells were stained with Hoechst 33342 and propidium iodide (PI) and assessed by automated microscopy. The percentage of living cells (normal-sized, Hoechst<sub>low</sub>, PI-) is presented after logarithmic-transformation ( $\ln(\text{concentration}_{\mu\text{M}} + 1)$ ) for each concentration. One representative experiment with quadruplicates is depicted as means  $\pm$  SD. A log-logistic regression was performed to determine the IC<sub>60</sub>. The indicated IC<sub>60</sub> values are means of one to three independent experiments.

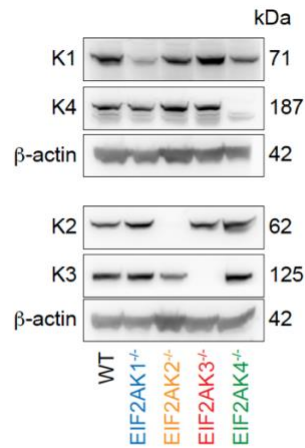

**Appendix Figure S2**

**Appendix Figure S2. Validation of the eIF2 $\alpha$  kinases knock out.** U2OS cells were knocked out for each of the four eIF2 $\alpha$  kinases using the CRISPR-Cas9 technology. One knock-out clone was selected for each kinase and was further validated by immunoblot with HRI (K1) and GCN2 (K4) on one and PKR (K2) and PERK (K3) on a parallel blot. Both membranes were further probed with anti  $\beta$ -actin antibody as a loading control.

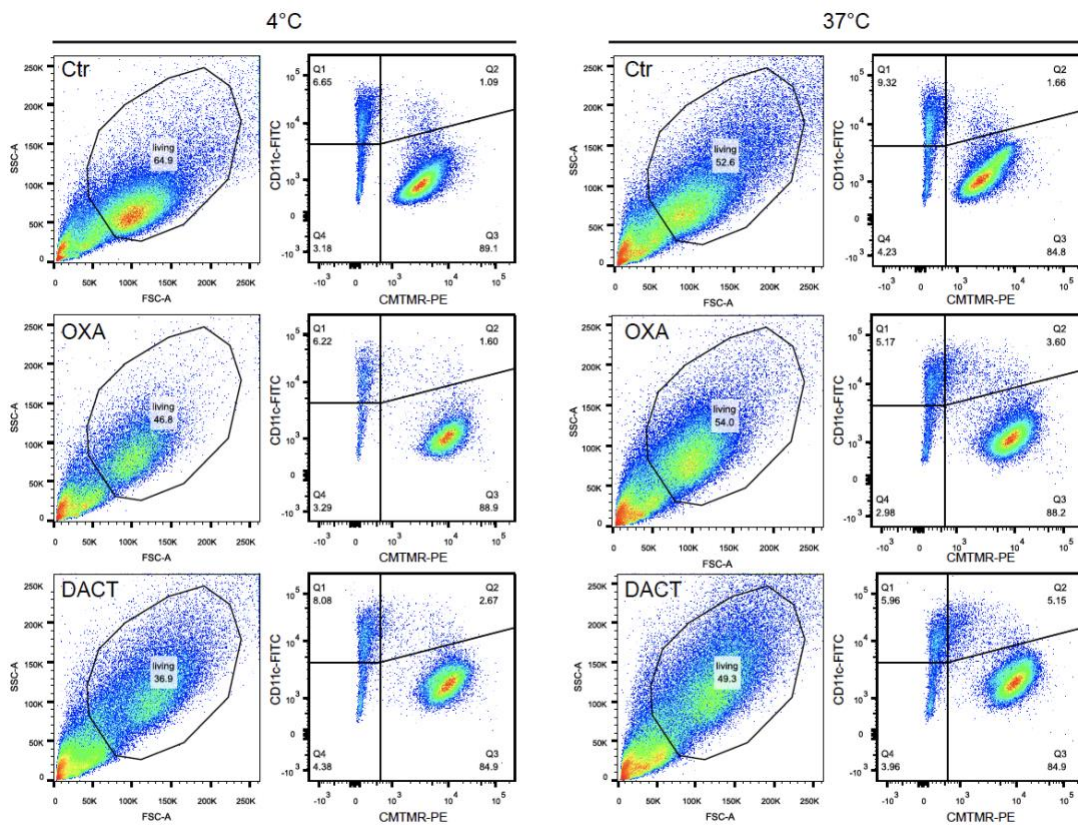

**Appendix Figure S3**

**Appendix Figure S3. Gating strategy for quantification of phagocytosis.** Mouse fibrosarcoma MCA205 cells were stained with CellTracker Orange (CMTMR) and treated for 24 h with 1  $\mu$ M dactinomycin (DACT) or 500  $\mu$ M oxaliplatin (OXA) as a positive control. Then, dying MCA205 were co-cultured with differentiated bone marrow derived dendritic cells (BMDCs) for 4 h at 37 °C or at 4 °C. Cells were collected and dendritic cells were stained with CD11c specific antibody before analysis by flowcytometry. After exclusion of debris, thresholds were applied to determine CD11c<sup>+</sup> and CMTR<sup>+</sup> cells, with double positive cells representing the events of phagocytosis.

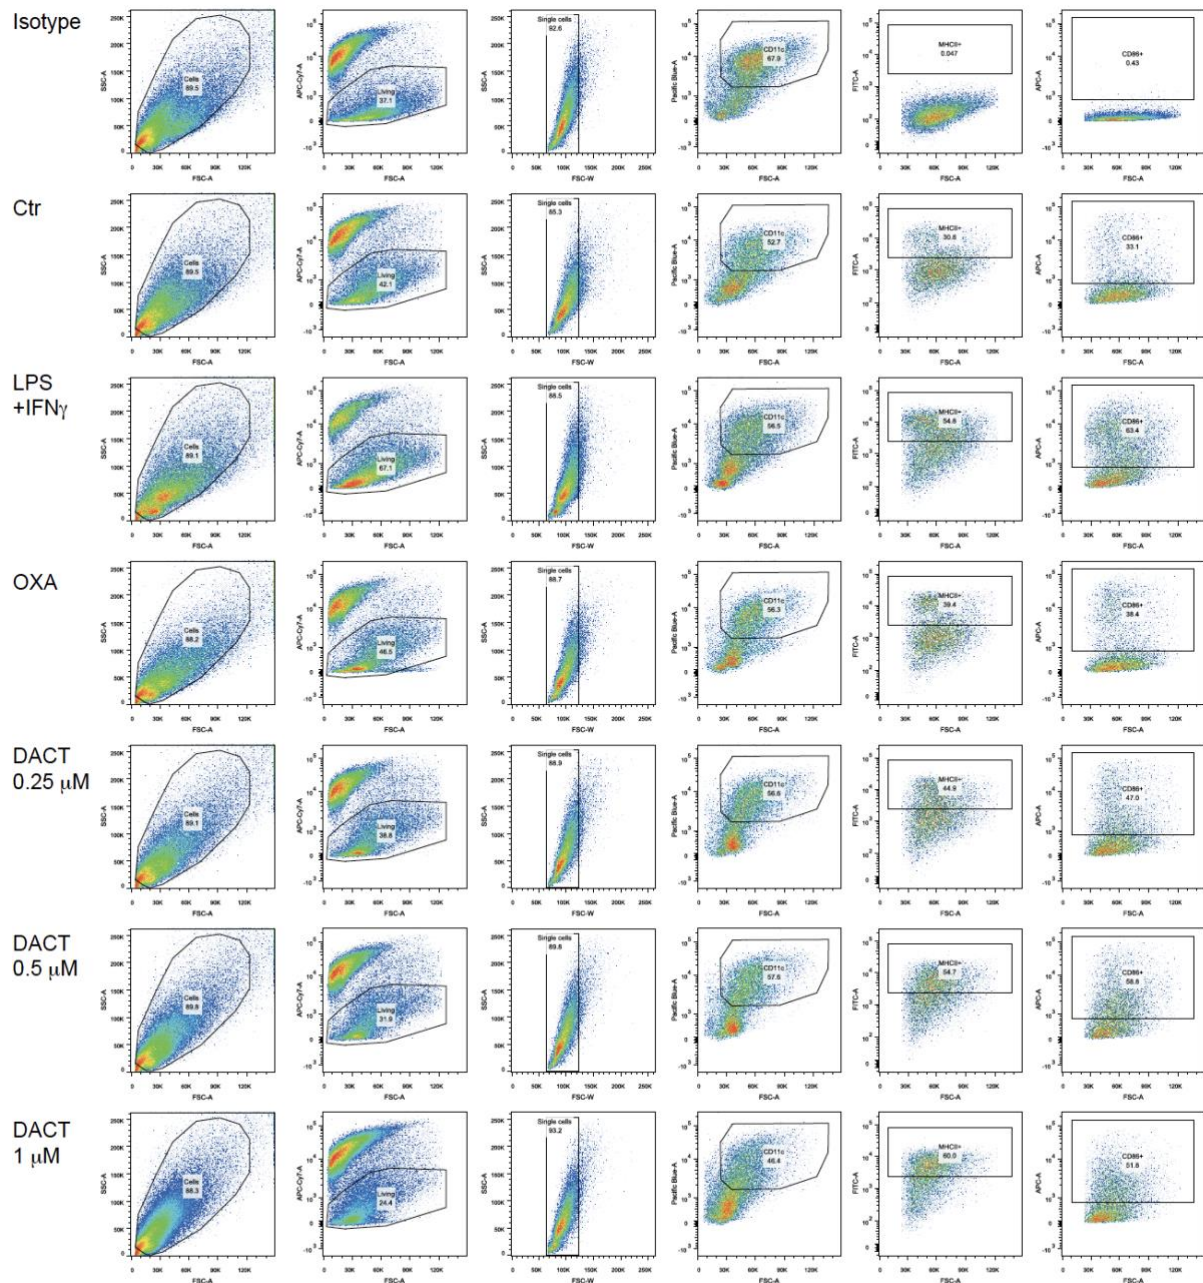

**Appendix Figure S4**

**Appendix Figure S4. Gating strategy for quantification of MHCII $^+$  and CD86 $^+$  cells among CD11c $^+$  cells.** Mouse fibrosarcoma MCA205 cells were treated for 24 h with 500  $\mu$ M oxaliplatin (OXA) or with 0.25, 0.5 or 1  $\mu$ M dactinomycin (DACT). Then, dying MCA205 were co-cultured with differentiated bone marrow derived dendritic cells (BMDCs) for 24 h at 37  $^{\circ}$ C. As a positive control, BMDCs were co-cultured with 1  $\mu$ g/mL LPS and 100 ng/mL IFN $\gamma$ . Cells were collected and stained with LIVE/DEAD marker, as well as with CD11c, MHCII and

CD86 specific conjugated antibodies before analysis by flowcytometry. After debris exclusion, living single cells were selected based on the LIVE/DEAD staining and SSC-A/FSC-W distribution. Finally, the percentages of MHCII<sup>+</sup> and CD86<sup>+</sup> among CD11c<sup>+</sup> cells were determined.

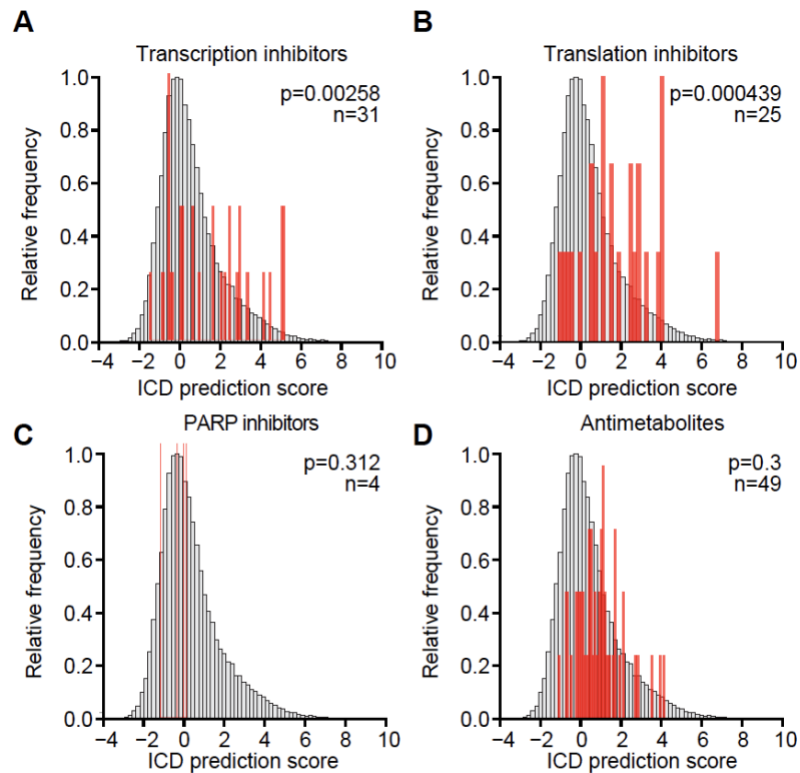

**Appendix Figure S5**

**Appendix Figure S5. Transcription and translation inhibitors are predicted as ICD inducers.** The 50,000 compounds of the NCI-60 library were annotated for different parameters including transcription and translation inhibition. The predicted ICD score was calculated with a previously described model built by artificial intelligence (Bezu et al, 2018). Data as in **Fig. 8 I-L** are depicted here as frequency normalized to the maximum frequency in relation to ICD scores. The distribution for all compounds is plotted in grey. In red, compounds falling into categories of interest are depicted which are transcription inhibitors (n=31) (**A**), translation inhibitors (n=25) (**B**) as well as two other random categories chosen as controls, PARP

inhibitors (n=4) and antimetabolites (n=49) (**C**, **D**). The p-values (p) calculated with Kolmogorov-Smirnov test are indicated on each graph.

**eIF2 $\alpha$ S51A:**

```

1   TTTTTCCTTT ATATAGTGAG TGGTAGCGTA TACAATGTTT GCTCACTTCG
51  GCAAAGAGTA GCTTTAGTTT TCTGATTAGT TATAATAGTG ATGCTTCCCA
101 TCATTTGATA TGCCTTAAAG TAGTATTTTA CTCTTGAGGT ATTCCTTTAA
151 TCCTTAGGTC TTGGAGTACT TTATAGATGG TCATTATTTT TTATGATTCC
201 TCTGAAACTA AAGGCAGAGA ATCACCCAAG CATTACAAAA ATGTTGAGCA
251 AAATAAAAAT TAAAGCTTGG TTCCTGAACA TTATCTGTTT TCTGGTACCA
301 CTTAAGAAGT TTCAAAGGAT GAGAAGACTA AGACTAATAA CTATTTTTTTT
351 CTTTCATCTTT TCTTTCAGTG GCAGGATGTG GAAATTGATT TTTTTTTTAT
401 TTTACCTTA  ACTGAATACT TACTTAATTC TTTTGTTTAA ATTGCAGAAT
    Pro Gly Leu Ser Cys Arg Phe Tyr Gln His Lys Phe Pro Glu Val Glu
451 GCCGGGTCTA AGTTGTAGAT TTTATCAACA CAAATTCCT GAGGTGGAAG
    Asp Val Val Met Val Asn Val Arg Ser Ile Ala Glu Met Gly Ala Tyr Val
501 ATGTAGTGAT GGTGAATGTC AGATCCATTG CTGAAATGGG GGCTTATGTC
    Ser Leu Leu Glu Tyr Asn Asn Ile Glu Gly Met Ile Leu Leu Ser Glu Leu
551 AGCTTGCTGG AATACAACAA CATTGAAGGC ATGATCTTTC TTAGTGAATT
    Ala Arg Arg Arg Ile Arg Ser Ile Asn Lys Leu Ile Arg Ile Gly Arg
601 AGCACGAAGG CGTATCCGTT CTATCAACAA ACTCATCCGA ATTGGCAGGA
    Asn Glu Cys Val Val Val Ile Arg Val Asp Lys Glu Lys
651 ATGAGTGTGT GTTTGCATT AGGGTGGACA AAGAAAAAGG TAAGTGAGAA
701 AAATATCTGT AATATAAATT TCAGATTTAA AATGGTTTAT TTAAAAATAC
751 ATTTTTTGTA AATTGCAAGC TGCAGCTTAA AAAAAAAGC TCCTTTTATA
801 CTTAAACCTT TTACATACAA AGTTGTTAGA AAAGGATGCC AATTAGCTAT
851 CTAAGCAAGA TCTCTTAATA GTAGTTTAAAT TAGTACATCC TAGGATTTTA
901 TGGATCAGAT AACTTGAATT TTATTTCTAG TGTTTATCAG GATCTTGATA
951 ATTGACTCAT GGTAACCAAA CTTAGAGACA GGTAAGTCAG AGTACTAGTT
1001 CATTTACATT GGTAGGCCTG AATATGTTGG ATGCCTTTTT CTTGATTTAA
1051 AGCTAAAATA GTAATGAGAT CACTGGGTAA GCATGAAAAT GGGGCAAATG
1101 GATTTTAGGG ATCTTTTATA TAAGCTTTGA AAAAGCAATA TACTATGCGT
1151 GTATATACAC ACCTGAAATC CAACATTGTA TATCTTGCTG GTAATTAGAA
1201 TGTTTCTCGA G

```

**Appendix Figure S6**

**Appendix Figure S6. Sequence for the eIF2 $\alpha$  knock-in mutation.** In order to generate an eIF2 $\alpha$  non-phosphorylable cell line (U2OS RFP-LC3 eIF2 $\alpha$ S51A), U2OS RFP-LC3 cells were co-transfected with a pX458 plasmid containing Cas9 and gRNAs to induce a DNA strand break at the appropriate site, together with a plasmid containing the DNA sequence of





**Appendix Table S1. Transcription and translation inhibition data for the custom anti-cancer library.** U2OS cells were treated with a home-made library of anti-cancer agents at 3  $\mu\text{M}$  for evaluating their ability to inhibit transcription (after 1.5 h treatment followed by 1 h in the presence of 5-ethynyl uridine (EU)) and translation (12 h treatment followed by 30 min in methionine-free medium and then 1.5 h in methionine-free medium supplemented with L-azidohomoalanine (AHA). The percentage of inhibition of transcription and translation was calculated and the mean of triplicates of one representative experiment among three is indicated as well as the standard deviation (SD) and the p-value (PVAL) which was calculated using a Student's t-test. These data were used to evaluate correlations with ICD parameters in **Fig. 8** and **EV6**.

| CID            | Name                  | Score        | Transcription inhibition |             |             |
|----------------|-----------------------|--------------|--------------------------|-------------|-------------|
|                |                       |              | Mean                     | SD          | PVAL        |
| 515328         | 5-Fluorodeoxycytidine | -0.073944055 | 0                        | 0           | 0.085102669 |
| 11977753       | Dactolisib            | 0.681357703  | 14.04747238              | 0.065312273 | 0.000919228 |
| 3885           | $\beta$ -Lapachone    | -0.159663085 | 20.95030652              | 13.50085812 | 0.305297648 |
| 5281078        | Mycophenolate mofetil | 0.239570191  | 44.84590908              | 2.499182983 | 0.001873086 |
| 72385          | Nonoxymol-9           | -2.034977072 | 8.451037648              | 2.110619699 | 0.076812698 |
| 394347         | RH-1                  | -0.264524221 | 83.36458718              | 3.906836417 | 0.006344573 |
| 101524         | Becatecarin           | 4.967787785  | 69.08411747              | 2.477979305 | 0.000656291 |
| 2019           | Dactinomycin          | 4.02340177   | 100                      | 0           | 1.76E-07    |
| 60699          | Topotecan             | 5.498023981  | 76.69808547              | 1.087669761 | 9.13E-08    |
| 372978, 108150 | Trabectedin           | 6.127930281  | 100                      | 0           | 1.76E-07    |
| 72271          | UCN-01                | 4.023450825  | 78.94456213              | 1.242796208 | 2.13E-07    |

**Appendix Table S2. Transcription inhibition for the positive and negative hits selected with the artificial intelligence module.** Positive and negative agents were selected thanks to an algorithm that can predict ICD (**Fig. 1**). They were tested for their ability to inhibit transcription: U2OS cells were treated with these agents around their  $\text{IC}_{50}$ : 1  $\mu\text{M}$  dactinomycin (DACT), 50  $\mu\text{M}$  topotecan, 1  $\mu\text{M}$  becatecarin, 0.5  $\mu\text{M}$  trabectedin, 5  $\mu\text{M}$  UCN-01, 30  $\mu\text{M}$  mycophenolate mofetil, 30  $\mu\text{M}$  nonoxymol-9, 25  $\mu\text{M}$  dactolisib, 2.5  $\mu\text{M}$   $\beta$ -lapachone, 5  $\mu\text{M}$  5-fluorodeoxycytidine and 2  $\mu\text{M}$  RH-1 for 1.5 h followed by 1 h where treatment was pursued in the presence of EU. The percentage of inhibition of transcription were calculated as previously described.



are given (A). After transfection, the DNA of cells that were able to proliferate was collected and amplified by PCR (B) before sending them for sequencing (C). To construct the eIF2 $\alpha$  kinases knock out cell lines (U2OS GFP-LC3 eIF2AK1<sup>-/-</sup>, eIF2AK2<sup>-/-</sup>, eIF2AK3<sup>-/-</sup> and eIF2AK4<sup>-/-</sup>), cells were transected with all-in one plasmids from Sigma-Aldrich containing Cas9 and the indicated gRNAs (D).

| Figure 2                                                                                                             | Groups         |         | p value     |
|----------------------------------------------------------------------------------------------------------------------|----------------|---------|-------------|
| <b>C) CALR, video IF</b><br>Mean +/- SD of triplicate from 1 representative exp. among 3<br>Student's t-test (R)     | MTX            | Ctr     | 1,50E-05    |
|                                                                                                                      | DACT 0.5       | Ctr     | 1,10E-05    |
|                                                                                                                      | DACT 1         | Ctr     | 8,90E-03    |
| <b>F) HMGB1, video IF</b><br>Mean +/- SD of quadruplicate from 1 representative exp. among 3<br>Student's t-test (R) | MTX            | Ctr     | 6,80E-03    |
|                                                                                                                      | DACT 0.5       | Ctr     | 2,20E-02    |
|                                                                                                                      | DACT 1         | Ctr     | 4,70E-04    |
| <b>H) ATP, IF</b><br>Mean +/- SD of quadruplicate from 1 representative exp. among 3<br>Student's t-test (R)         | MTX 6h         | Ctr 6h  | 0,00015333  |
|                                                                                                                      | MTX 12h        | Ctr 12h | 8,22E-06    |
|                                                                                                                      | MTX 24h        | Ctr 24h | 1,65E-06    |
|                                                                                                                      | DACT 0.5 6h    | Ctr 6h  | 0,001476146 |
|                                                                                                                      | DACT 0.5 12h   | Ctr 12h | 0,083606433 |
|                                                                                                                      | DACT 0.5 24h   | Ctr 24h | 0,000601737 |
|                                                                                                                      | DACT 1 6h      | Ctr 6h  | 0,014935182 |
|                                                                                                                      | DACT 1 12h     | Ctr 12h | 0,001252852 |
|                                                                                                                      | DACT 1 24h     | Ctr 24h | 0,000102997 |
| <b>J) IFN1, IF</b><br>Mean +/-SEM of 5 independent exp.<br>Student's t-test (R)                                      | MTX            | Ctr     | 3,48E-09    |
|                                                                                                                      | IFN $\alpha$ 1 | Ctr     | 5,58E-06    |
|                                                                                                                      | DACT 0.5       | Ctr     | 4,54E-05    |
|                                                                                                                      | DACT 1         | Ctr     | 1,14E-03    |
| <b>L) CALR, Cytometry</b><br>Mean +/-SEM of 6 independent experiments<br>Student's t-test (Excel)                    | MTX            | Ctr     | 0,046972592 |
|                                                                                                                      | DACT 0.5       | Ctr     | 0,047746877 |
|                                                                                                                      | DACT 1         | Ctr     | 0,026430706 |
| <b>M) HMGB1, ELISA</b><br>Mean +/-SEM of 4 independent experiments<br>Student's t-test (Excel)                       | MTX            | Ctr     | 0,041171619 |
|                                                                                                                      | DACT 0.5       | Ctr     | 0,043039251 |
|                                                                                                                      | DACT 1         | Ctr     | 0,041743204 |
| <b>N) ATP, Bioluminescence Assay</b><br>Mean +/- SD of triplicate from 1 representative exp. among 3                 | MTX            | Ctr     | 0,032937717 |
|                                                                                                                      | DACT 0.5       | Ctr     | 0,001542082 |

|                          |        |     |             |
|--------------------------|--------|-----|-------------|
| Student's t-test (Excel) | DACT 1 | Ctr | 0,002351196 |
|--------------------------|--------|-----|-------------|

| Figure 3                                                                                                                      | Groups                                                                                                  |             | p value     |             |
|-------------------------------------------------------------------------------------------------------------------------------|---------------------------------------------------------------------------------------------------------|-------------|-------------|-------------|
| <b>B) pelf2<math>\alpha</math>, IF</b><br>Mean +/-SEM of 3 independent exp.<br>Student's t-test (R)                           | THAPS                                                                                                   | Ctr         | 0,029149288 |             |
|                                                                                                                               | DACT 0.25                                                                                               | Ctr         | 0,003120227 |             |
|                                                                                                                               | DACT 0.5                                                                                                | Ctr         | 0,018061545 |             |
|                                                                                                                               | DACT 1                                                                                                  | Ctr         | 0,013543452 |             |
| <b>D) ATF4, IF</b><br>Mean +/-SEM of 5 independent exp.<br>Student's t-test (R)                                               | THAPS                                                                                                   | Ctr         | 0,01344063  |             |
|                                                                                                                               | DACT 0.25                                                                                               | Ctr         | 0,12845239  |             |
|                                                                                                                               | DACT 0.5                                                                                                | Ctr         | 0,05701633  |             |
|                                                                                                                               | DACT 1                                                                                                  | Ctr         | 0,08760908  |             |
| <b>F) ATF6, IF</b><br>Mean +/-SEM of 6 independent exp.<br>Student's t-test (R)                                               | THAPS                                                                                                   | Ctr         | 1,05E-04    |             |
|                                                                                                                               | DACT 0.25                                                                                               | Ctr         | 8,87E-01    |             |
|                                                                                                                               | DACT 0.5                                                                                                | Ctr         | 5,32E-01    |             |
|                                                                                                                               | DACT 1                                                                                                  | Ctr         | 5,19E-02    |             |
| <b>H) XBP1, IF</b><br>Mean +/-SEM of 5 independent exp.<br>Student's t-test (R)                                               | THAPS                                                                                                   | Ctr         | 0,000217507 |             |
|                                                                                                                               | DACT 0.25                                                                                               | Ctr         | 0,753570158 |             |
|                                                                                                                               | DACT 0.5                                                                                                | Ctr         | 0,644922089 |             |
|                                                                                                                               | DACT 1                                                                                                  | Ctr         | 0,773716594 |             |
| <b>J) pelf2<math>\alpha</math> kinases, IF</b><br>Mean +/-SEM of 3 independent exp.<br>Pairwise multiple comparisons test (R) | THAPS WT                                                                                                | Ctr WT      | 0,000952716 |             |
|                                                                                                                               | DACT WT                                                                                                 | Ctr WT      | 0,008865305 |             |
|                                                                                                                               | THAPS K1                                                                                                | Ctr K1      | 0,000159565 |             |
|                                                                                                                               | DACT K1                                                                                                 | Ctr K1      | 0,156766864 |             |
|                                                                                                                               | THAPS K2                                                                                                | Ctr K2      | 0,001798423 |             |
|                                                                                                                               | DACT K2                                                                                                 | Ctr K2      | 0,067468508 |             |
|                                                                                                                               | THAPS K3                                                                                                | Ctr K3      | 0,356877726 |             |
|                                                                                                                               | DACT K3                                                                                                 | Ctr K3      | 0,755373822 |             |
|                                                                                                                               | THAPS K4                                                                                                | Ctr K4      | 6,75E-07    |             |
|                                                                                                                               | DACT K4                                                                                                 | Ctr K4      | 0,001798423 |             |
|                                                                                                                               | THAPS K1                                                                                                | THAPS WT    | 0,641458396 |             |
|                                                                                                                               | THAPS K2                                                                                                | THAPS WT    | 0,156766864 |             |
|                                                                                                                               | THAPS K3                                                                                                | THAPS WT    | 0,000597212 |             |
|                                                                                                                               | THAPS K4                                                                                                | THAPS WT    | 0,156766864 |             |
|                                                                                                                               | DACT K1                                                                                                 | DACT WT     | 0,213167232 |             |
|                                                                                                                               | DACT K2                                                                                                 | DACT WT     | 0,432893435 |             |
|                                                                                                                               | DACT K3                                                                                                 | DACT WT     | 0,003644329 |             |
|                                                                                                                               | DACT K4                                                                                                 | DACT WT     | 0,594443002 |             |
|                                                                                                                               | <b>L) pelf2<math>\alpha</math> ex vivo, IF</b><br>Mean +/-SD of each mouse data<br>Student's t-test (R) | TM (5)      | Ctr (8)     | 0,021795268 |
|                                                                                                                               |                                                                                                         | DACT 6h (8) | Ctr (8)     | 0,008385681 |
| DACT 24h (6)                                                                                                                  |                                                                                                         | Ctr (8)     | 0,869451002 |             |

|                                                                                     |              |         |             |
|-------------------------------------------------------------------------------------|--------------|---------|-------------|
| <b>N) CALR ex vivo, IF</b><br>Mean +/-SD of each mouse data<br>Student's t-test (R) | TM (5)       | Ctr (8) | 0,360972484 |
|                                                                                     | DACT 6h (8)  | Ctr (8) | 0,077518631 |
|                                                                                     | DACT 24h (6) | Ctr (8) | 0,002390871 |

| Figure 4                                                                                                                 | Groups           |          | LogRank p value |
|--------------------------------------------------------------------------------------------------------------------------|------------------|----------|-----------------|
| <b>B) Phagocytosis</b><br>Mean +/-SEM of 3 independent exp.<br>Pairwise multiple comparisons test (R)                    | Ctr 37°C         | Ctr 4°C  | 0,955200917     |
|                                                                                                                          | OXA 37°C         | OXA 4°C  | 0,008756406     |
|                                                                                                                          | DACT 37°C        | DACT 4°C | 0,008756406     |
|                                                                                                                          | OXA 4°C          | Ctr 4°C  | 0,256260458     |
|                                                                                                                          | DACT 4°C         | Ctr 4°C  | 0,136501018     |
|                                                                                                                          | OXA 37°C         | Ctr 37°C | 0,00142704      |
|                                                                                                                          | DACT 37°C        | Ctr 37°C | 0,001125467     |
| <b>C) MHCII</b><br>Mean +/-SEM of 5 independent exp.<br>Student's t-test (Excel)                                         | LPS+IFN $\gamma$ | Ctr      | 0,002           |
|                                                                                                                          | OXA              | Ctr      | 0,0031          |
|                                                                                                                          | DACT 0.25        | Ctr      | <0.0001         |
|                                                                                                                          | DACT 0.5         | Ctr      | <0.0001         |
|                                                                                                                          | DACT 1           | Ctr      | 0,0003          |
| <b>D) CD86</b><br>Mean +/-SEM of 5 independent exp.<br>Student's t-test (Excel)                                          | LPS+IFN $\gamma$ | Ctr      | <0.0001         |
|                                                                                                                          | OXA              | Ctr      | 0,0105          |
|                                                                                                                          | DACT 0.25        | Ctr      | 0,0023          |
|                                                                                                                          | DACT 0.5         | Ctr      | 0,0023          |
|                                                                                                                          | DACT 1           | Ctr      | 0,0101          |
| <b>G) Vaccination-Survival</b><br>Survival of 1 representative exp. among 3<br>LogRank test (TumGrowth software package) | DACT (7)         | Ctr (8)  | 0,0002          |

| Figure 5                                                          | Groups             |               | Mean tumor growth                          | Survival                                  |
|-------------------------------------------------------------------|--------------------|---------------|--------------------------------------------|-------------------------------------------|
|                                                                   |                    |               | Type II ANOVA (TumGrowth software package) | LogRank test (TumGrowth software package) |
|                                                                   |                    |               | p value                                    | LogRank p value                           |
| <b>D, E, G, H) In vivo effect of DACT +/- aPD-1 +/- aCD4/aCD8</b> | DACT (8)           | Ctr (9)       | <0.0001                                    | 0,0075                                    |
|                                                                   | DACT+aCD4/aCD8 (9) | aCD4/aCD8 (9) | 0,4488                                     | 0,1239                                    |
|                                                                   | DACT+aCD4/aCD8 (9) | DACT (8)      | <0.0001                                    | <0.0001                                   |
|                                                                   | aCD4/aCD8 (9)      | Ctr (9)       | 0,0119                                     | 0,0049                                    |
|                                                                   | DACT+aPD-1 (7)     | aPD-1 (8)     | <0.0001                                    | 0,0013                                    |
|                                                                   | DACT+aPD-1 (7)     | DACT (8)      | 0,2566                                     | 0,2741                                    |
|                                                                   | DACT+aPD-1 (7)     | Ctr (9)       | <0.0001                                    | 0,0013                                    |

|  |           |          |        |       |
|--|-----------|----------|--------|-------|
|  | aPD-1 (8) | Ctrl (9) | 0,3021 | 0,509 |
|--|-----------|----------|--------|-------|

|                       |            | Survival                                  |         |
|-----------------------|------------|-------------------------------------------|---------|
|                       |            | LogRank test (TumGrowth software package) |         |
|                       |            | LogRank p value                           |         |
| <b>K) Rechallenge</b> | Cured (11) | Naïve (5)                                 | <0.0001 |

| Figure 6                                                                                                                     | Groups    |           | p-value |
|------------------------------------------------------------------------------------------------------------------------------|-----------|-----------|---------|
| <b>B) IFN<math>\gamma</math>, qPCR</b><br>Mean +/- of each mouse data from 2 independent exp.<br>Student's t-test (GraphPad) | DACT (23) | Ctrl (22) | 0,0259  |

|                                                                 | Groups                 |                   | Mean tumor growth                          | Survival                                  |
|-----------------------------------------------------------------|------------------------|-------------------|--------------------------------------------|-------------------------------------------|
|                                                                 |                        |                   | Type II ANOVA (TumGrowth software package) | LogRank test (TumGrowth software package) |
|                                                                 |                        |                   | p value                                    | LogRank p value                           |
| <b>E, F) In vivo effect of DACT +/- aIFN<math>\gamma</math></b> | DACT (8)               | Ctrl (7)          | 0,0419                                     | 0,0152                                    |
|                                                                 | DACT+aIFN $\gamma$ (8) | aIFN $\gamma$ (7) | 0,1235                                     | 0,1734                                    |
|                                                                 | DACT+aIFN $\gamma$ (8) | DACT (8)          | 0,3592                                     | 0,4676                                    |
|                                                                 | aIFN $\gamma$ (7)      | Ctrl (7)          | 0,7349                                     | 0,926                                     |

| Figure 7             | B) Transcription inhibition, EU                                 |                      | D) Transcription inhibition, FBL-NCL                            | F) Translation inhibition, AHA                                  |
|----------------------|-----------------------------------------------------------------|----------------------|-----------------------------------------------------------------|-----------------------------------------------------------------|
|                      | Mean +/- SD of quadruplicate from 1 representative exp. among 3 |                      | Mean +/- SD of quadruplicate from 1 representative exp. among 3 | Mean +/- SD of quadruplicate from 1 representative exp. among 3 |
| Student's t-test (R) |                                                                 | Student's t-test (R) | Student's t-test (R)                                            | Student's t-test (R)                                            |
| Groups               |                                                                 | p value              |                                                                 |                                                                 |
| DACT 0.5             | Ctrl                                                            | 2,13E-16             | 9.78235981592678e-10                                            | 3,49E-06                                                        |
| DACT 1               | Ctrl                                                            | 1,38E-17             | 2.484857480609e-16                                              | 1,27E-08                                                        |
| DACT 5               | Ctrl                                                            | 6,73E-17             | 8.07113378087854e-06                                            | 3,36E-08                                                        |
| BTZ 0.5              | Ctrl                                                            | 2,12E-01             | 2.94507283335182e-06                                            | 5,29E-11                                                        |
| BTZ 1                | Ctrl                                                            | 1,91E-01             | 9.55683085110637e-07                                            | 7,09E-11                                                        |
| BTZ 5                | Ctrl                                                            | 1,97E-02             | 0.00406981296887172                                             | 5,22E-10                                                        |
| CDDP 75              | Ctrl                                                            | 2,81E-01             | 0.00251764516117751                                             | 1,36E-03                                                        |
| CDDP 150             | Ctrl                                                            | 9,89E-06             | 0.00147438328122473                                             | 8,03E-07                                                        |

|           |     |          |                      |          |
|-----------|-----|----------|----------------------|----------|
| CDDP 300  | Ctr | 4,00E-04 | 4.85975742999306e-06 | 1,06E-04 |
| CRIZO 10  | Ctr | 7,66E-13 | 0.00622805916226957  | 6,52E-03 |
| CRIZO 20  | Ctr | 1,20E-03 | 0.000636415429439258 | 1,51E-04 |
| CRIZO 40  | Ctr | 5,16E-07 | 1.59936200125524e-09 | 1,88E-09 |
| DAUNO 0.5 | Ctr | 9,46E-15 | 5.56641355469102e-16 | 3,39E-08 |
| DAUNO 1   | Ctr | 3,33E-07 | 8.3087695351635e-08  | 1,16E-10 |
| DAUNO 5   | Ctr | 1,40E-16 | 7.43217205947045e-13 | 1,91E-09 |
| DOC 0.5   | Ctr | 4,36E-02 | 0.337287264492058    | 4,20E-01 |
| DOC 1     | Ctr | 4,36E-02 | 0.14910057616936     | 4,34E-01 |
| DOC 5     | Ctr | 4,36E-02 | 0.218242188471649    | 2,44E-05 |
| DOXO 0.5  | Ctr | 1,01E-12 | 2.06322981656859e-05 | 9,83E-03 |
| DOXO 1    | Ctr | 5,11E-09 | 1.54998027427469e-06 | 5,20E-06 |
| DOXO 5    | Ctr | 6,79E-17 | 1.43382046996478e-05 | 6,59E-07 |
| EPI 0.5   | Ctr | 8,17E-13 | 8.23169101113265e-06 | 2,98E-01 |
| EPI 1     | Ctr | 1,49E-04 | 1.45309610655136e-17 | 6,57E-01 |
| EPI 5     | Ctr | 8,05E-16 | 3.95502749477921e-05 | 2,82E-03 |
| MTX 0.5   | Ctr | 1,54E-13 | 6.7638958979284e-14  | 2,98E-01 |
| MTX 1     | Ctr | 5,54E-04 | 6.7638958979284e-14  | 5,17E-03 |
| MTX 5     | Ctr | 2,69E-16 | 6.7638958979284e-14  | 9,39E-10 |
| OXA 250   | Ctr | 4,09E-04 | 3.92253643651811e-06 | 1,42E-09 |
| OXA 500   | Ctr | 1,50E-04 | 1.55874864708109e-07 | 1,70E-06 |
| OXA 1000  | Ctr | 2,04E-04 | 7.56740516085633e-06 | 2,36E-11 |
| PACL 0.5  | Ctr | 4,36E-02 | 0.00188584778105787  | 3,77E-05 |
| PACL 1    | Ctr | 4,36E-02 | 0.0903964518384545   | 2,97E-03 |
| PACL 5    | Ctr | 4,36E-02 | 0.599244580147299    | 2,40E-02 |
| VB 0.5    | Ctr | 4,36E-02 | 0.00666383224561728  | 5,77E-09 |
| VB 1      | Ctr | 2,42E-01 | 0.000247806243761579 | 8,33E-09 |
| VB 5      | Ctr | 1,39E-01 | 0.00031167957216998  | 3,13E-06 |
| VC 0.5    | Ctr | 4,36E-02 | 0.0101023161356121   | 3,48E-08 |
| VC 1      | Ctr | 4,36E-02 | 0.000361387990917593 | 5,47E-10 |
| VC 5      | Ctr | 8,31E-02 | 0.000489599872636203 | 2,56E-08 |

| Figure EV2                                                                                          | Groups   |     | p value     |
|-----------------------------------------------------------------------------------------------------|----------|-----|-------------|
| <b>A) pelf2<math>\alpha</math>, WB</b><br>Mean +/-SEM of 4 independent exp.<br>Student's t-test (R) | THAPS    | Ctr | 0,046740273 |
|                                                                                                     | DACT 0.5 | Ctr | 0,002562029 |
|                                                                                                     | DACT 1   | Ctr | 0,006155752 |
|                                                                                                     | DACT 2   | Ctr | 0,004986772 |
| <b>C) CALR, Cytometry</b><br>Mean +/-SEM of 6 independent exp.<br>Student's t-test (Excel)          | MTX      | Ctr | 0,026879887 |
|                                                                                                     | DACT 0.5 | Ctr | 0,00848546  |
|                                                                                                     | DACT 1   | Ctr | 0,004918971 |
| <b>D) ATP, Bioluminescence assay</b>                                                                | MTX      | Ctr | 0,005921447 |

|                                                              |                |     |             |
|--------------------------------------------------------------|----------------|-----|-------------|
| Mean +/- SD of triplicate from 1 representative exp. among 3 | DACT 0.5       | Ctr | 0,000428236 |
|                                                              | DACT 1         | Ctr | 2,71625E-06 |
| Student's t-test (Excel)                                     | DACT 1         | Ctr | 2,71625E-06 |
| <b>E) HMGB1, ELISA</b><br>Mean +/-SEM of 5 independent exp.  | MTX            | Ctr | 0,015940497 |
|                                                              | DACT 0.5       | Ctr | 0,012630298 |
|                                                              | DACT 1         | Ctr | 0,025597172 |
| Student's t-test (Excel)                                     | DACT 1         | Ctr | 0,025597172 |
| <b>G) IFN1, IF</b><br>Mean +/-SEM of 5 independent exp.      | MTX            | Ctr | 2,86E-07    |
|                                                              | IFN $\alpha$ 1 | Ctr | 3,12E-03    |
|                                                              | DACT 0.5       | Ctr | 5,99E-04    |
|                                                              | DACT 1         | Ctr | 2,45E-02    |
| Student's t-test (R)                                         | DACT 1         | Ctr | 2,45E-02    |

| Figure EV3                                               | Groups         |           | Mean tumor growth                          | Survival                                  |
|----------------------------------------------------------|----------------|-----------|--------------------------------------------|-------------------------------------------|
|                                                          |                |           | Type II ANOVA (TumGrowth software package) | LogRank test (TumGrowth software package) |
|                                                          |                |           | p value                                    | LogRank p value                           |
| <b>D, E) In vivo effect of DACT+CDDP in C57Bl/6 mice</b> | DACT (10)      | Ctr (9)   | 0,3354                                     | 0,0008                                    |
|                                                          | CDDP (9)       | Ctr (9)   | 0,4116                                     | 0,7881                                    |
|                                                          | MTX (8)        | Ctr (9)   | 0,0056                                     | 0,0045                                    |
|                                                          | DACT+CDDP (10) | CDDP (9)  | 0,0003                                     | <0.0001                                   |
|                                                          | DACT+CDDP (10) | DACT (10) | 0,0355                                     | 0,0022                                    |
|                                                          | DACT+CDDP (10) | Ctr (9)   | 0,0039                                     | <0.0001                                   |
| <b>I, J) In vivo effect of DACT+CDDP in Nude mice</b>    | DACT (10)      | Ctr (10)  | 0,356                                      | 0,0628                                    |
|                                                          | CDDP (9)       | Ctr (10)  | 0,3927                                     | 0,5191                                    |
|                                                          | MTX (10)       | Ctr (10)  | 0,8284                                     | 0,5916                                    |
|                                                          | DACT+CDDP (10) | CDDP (9)  | 0,9283                                     | 0,2783                                    |
|                                                          | DACT+CDDP (10) | DACT (10) | 0,0905                                     | 0,838                                     |
|                                                          | DACT+CDDP (10) | Ctr (10)  | 0,4054                                     | 0,1281                                    |
| <b>N, O) In vivo effect of DACT+CDDP+aPD-1</b>           | DACT (10)      | Ctr (9)   | 0,2167                                     | 0,0077                                    |
|                                                          | CDDP (10)      | Ctr (9)   | 0,9984                                     | 0,9931                                    |
|                                                          | aPD-1 (9)      | Ctr (9)   | 0,0662                                     | 0,0066                                    |
|                                                          | DACT+CDDP (10) | CDDP (10) | 0,2712                                     | 0,0204                                    |
|                                                          | DACT+CDDP (10) | DACT (10) | 0,8573                                     | 0,7607                                    |



|  |                     |                 |         |         |
|--|---------------------|-----------------|---------|---------|
|  | DACT+CDDP (10)      | Ctr (9)         | 0,287   | 0,0268  |
|  | DACT+aPD-1 (10)     | DACT (10)       | 0,0057  | 0,0001  |
|  | DACT+aPD-1 (10)     | aPD-1 (9)       | 0,0393  | 0,0183  |
|  | DACT+aPD-1 (10)     | Ctr (9)         | 0,0002  | <0.0001 |
|  | CDDP+aPD-1 (9)      | CDDP (10)       | 0,0734  | 0,0344  |
|  | CDDP+aPD-1 (9)      | aPD-1 (9)       | 0,9189  | 0,7594  |
|  | CDDP+aPD-1 (9)      | Ctr (9)         | 0,0824  | 0,0356  |
|  | DACT+CDDP+aPD-1 (9) | DACT+CDDP (10)  | 0,0006  | 0,0037  |
|  | DACT+CDDP+aPD-1 (9) | DACT+aPD-1 (10) | 0,5014  | 0,4479  |
|  | DACT+CDDP+aPD-1 (9) | CDDP+aPD-1 (9)  | 0,0067  | 0,0135  |
|  | DACT+CDDP+aPD-1 (9) | DACT (10)       | 0,001   | 0,0052  |
|  | DACT+CDDP+aPD-1 (9) | CDDP (10)       | <0.0001 | 0,0002  |
|  | DACT+CDDP+aPD-1 (9) | aPD-1 (9)       | 0,0088  | 0,0252  |
|  | DACT+CDDP+aPD-1 (9) | Ctr (9)         | <0.0001 | 0,0002  |

|                          |           |           | Survival                                   |
|--------------------------|-----------|-----------|--------------------------------------------|
|                          |           |           | Type II ANOVA (TumGrowth software package) |
|                          |           |           | p value                                    |
| <b>P, Q) Rechallenge</b> | Cured (4) | Naïve (5) | 0,0005                                     |

| <b>Figure EV4</b> |          | <b>B) CD8<sup>+</sup>/CD4<sup>+</sup>FoxP3<sup>+</sup></b> |
|-------------------|----------|------------------------------------------------------------|
| <b>Groups</b>     |          | <b>p-value</b>                                             |
| DACT (10)         | Ctr (10) | 0,041                                                      |
|                   |          | <b>C) CD3<sup>+</sup>NK1.1<sup>+</sup></b>                 |

|                                                                    |
|--------------------------------------------------------------------|
| Student's t-test<br>(GraphPad)                                     |
| <b>p-value</b>                                                     |
| 0,0305                                                             |
| <b>D) CD3<sup>+</sup>NK1.1<sup>+</sup></b>                         |
| Student's t-test<br>(GraphPad)                                     |
| <b>p-value</b>                                                     |
| 0,0222                                                             |
| <b>E) IL17 in CD4<sup>+</sup>CD8<sup>-</sup></b>                   |
| Student's t-test<br>(GraphPad)                                     |
| <b>p-value</b>                                                     |
| 0,0068                                                             |
| <b>F) IL17 in CD4<sup>-</sup>CD8<sup>+</sup></b>                   |
| Student's t-test<br>(GraphPad)                                     |
| <b>p-value</b>                                                     |
| 0,0243                                                             |
| <b>G) IL17 in CD3<sup>+</sup>TCRgd<sup>+</sup></b>                 |
| Student's t-test<br>(GraphPad)                                     |
| <b>p-value</b>                                                     |
| 0,0721                                                             |
| <b>H) IFN<math>\gamma</math> in CD4<sup>+</sup>CD8<sup>+</sup></b> |
| Student's t-test<br>(GraphPad)                                     |
| <b>p-value</b>                                                     |
| 0,1265                                                             |
| <b>I) IL4 in CD4<sup>+</sup>CD8<sup>-</sup></b>                    |
| Student's t-test<br>(GraphPad)                                     |
| <b>p-value</b>                                                     |
| 0,4646                                                             |

Figure EV5

B) Translation inhibition,  
AHA

|        |                 | Mean +/- SD of quadruplicate from 1 representative exp. among 3 |             |
|--------|-----------------|-----------------------------------------------------------------|-------------|
|        |                 | Student's t-test (R)                                            |             |
| Groups |                 |                                                                 |             |
| WT     | CHX             | Ctr                                                             | 8,00E-31    |
|        | THAPS           | Ctr                                                             | 3,26E-31    |
|        | DACT            | Ctr                                                             | 4,22E-18    |
|        | FLAVO           | Ctr                                                             | 5,65E-25    |
|        | LURBI           | Ctr                                                             | 7,90E-16    |
|        | BTZ             | Ctr                                                             | 1,85E-20    |
|        | CDDP            | Ctr                                                             | 8,29E-31    |
|        | CRIZ            | Ctr                                                             | 2,91E-25    |
|        | DAUN            | Ctr                                                             | 2,34E-31    |
|        | DOC             | Ctr                                                             | 3,66E-06    |
|        | DOXO            | Ctr                                                             | 1,78E-31    |
|        | EPI             | Ctr                                                             | 5,22E-28    |
|        | MTX             | Ctr                                                             | 1,78E-31    |
|        | OXA             | Ctr                                                             | 3,52E-28    |
|        | PACL            | Ctr                                                             | 6,51E-05    |
|        | VB              | Ctr                                                             | 9,73E-11    |
| VC     | Ctr             | 5,01E-11                                                        |             |
|        | Ctr ISRIB       | Ctr WT                                                          | 0,925516588 |
|        | Ctr eIF2aS51A   | Ctr WT                                                          | 0,039781052 |
|        | CHX ISRIB       | CHX WT                                                          | 0,935088337 |
|        | CHX eIF2aS51A   | CHX WT                                                          | 0,708190897 |
|        | THAPS ISRIB     | THAPS WT                                                        | 4,36E-10    |
|        | THAPS eIF2aS51A | THAPS WT                                                        | 1,07E-20    |
|        | DACT ISRIB      | DACT WT                                                         | 0,10764557  |
|        | DACT eIF2aS51A  | DACT WT                                                         | 0,022295146 |
|        | FLAVO ISRIB     | FLAVO WT                                                        | 0,697041909 |
|        | FLAVO eIF2aS51A | FLAVO WT                                                        | 0,225823573 |
|        | LURBI ISRIB     | LURBI WT                                                        | 0,70804377  |
|        | LURBI eIF2aS51A | LURBI WT                                                        | 0,01346988  |
|        | BTZ ISRIB       | BTZ WT                                                          | 0,164902683 |
|        | BTZ eIF2aS51A   | BTZ WT                                                          | 0,159869469 |
|        | CDDP ISRIB      | CDDP WT                                                         | 0,453742982 |

|                |         |                                                            |
|----------------|---------|------------------------------------------------------------|
| CDDP eIF2aS51A | CDDP WT | 0,99590432                                                 |
| CRIZ ISRIB     | CRIZ WT | 0,021604526                                                |
| CRIZ eIF2aS51A | CRIZ WT | 0,271658825                                                |
| DAUN ISRIB     | DAUN WT | 0,84542227                                                 |
| DAUN eIF2aS51A | DAUN WT | 1                                                          |
| DOC ISRIB      | DOC WT  | 0,667754708                                                |
| DOC eIF2aS51A  | DOC WT  | 0,402779966                                                |
| DOXO ISRIB     | DOXO WT | 1                                                          |
| DOXO eIF2aS51A | DOXO WT | 1                                                          |
| EPI ISRIB      | EPI WT  | 0,554909639                                                |
| EPI eIF2aS51A  | EPI WT  | 0,444244333                                                |
| MTX ISRIB      | MTX WT  | 1                                                          |
| MTX eIF2aS51A  | MTX WT  | 1                                                          |
| OXA ISRIB      | OXA WT  | 0,649105822                                                |
| OXA eIF2aS51A  | OXA WT  | 0,470368039                                                |
| PACL ISRIB     | PACL WT | 0,971150986                                                |
| PACL eIF2aS51A | PACL WT | 0,371177791                                                |
| VB ISRIB       | VB WT   | 0,833967549                                                |
| VB eIF2aS51A   | VB WT   | 0,749286903                                                |
| VC ISRIB       | VC WT   | 0,401817745                                                |
| VC eIF2aS51A   | VC WT   | 0,090095054                                                |
|                |         | <b>F) Percentage GFP inhibition</b>                        |
|                |         | Mean +/- SD 2 experiments -<br>Statistics of 3 experiments |
|                |         | Student's t-test (R)                                       |
|                |         | <b>p-value</b>                                             |
| DACT           | Ctr     | 2.3e-03                                                    |
| CRIZ           | Ctr     | 2.3e-03                                                    |
| DAUN           | Ctr     | 1.4e-02                                                    |
| DOXO           | Ctr     | 8.6e-03                                                    |
| EPI            | Ctr     | 6.8e-05                                                    |
| LURBI          | Ctr     | 2.2e-03                                                    |
| MTX            | Ctr     | 1.8e-04                                                    |
| OXA            | Ctr     | 6.9e-05                                                    |
|                |         | <b>G) Percentage reversibility</b>                         |
|                |         | Mean +/- SD 2 experiments -<br>Statistics of 3 experiments |

|       |     | Student's t-test (R) |
|-------|-----|----------------------|
|       |     | <b>p-value</b>       |
| DACT  | Ctr | 2.1e-01              |
| CRIZ  | Ctr | 2.3e-03              |
| DAUN  | Ctr | 1.8e-01              |
| DOXO  | Ctr | 1                    |
| EPI   | Ctr | 2.1e-01              |
| LURBI | Ctr | 2.1e-01              |
| MTX   | Ctr | 4.6e-02              |
| OXA   | Ctr | 1.1e-02              |

**Appendix Table S5. Statistical tests and p-values.** Statistical test and calculated p-values as reported in the manuscript.
